# Supplementary material
Source: PubMed Central journal article supplement (PMC6498055)
Supplement: JVI.00103-19-s0001.pdf [file JVI.00103-19-s0001.pdf]

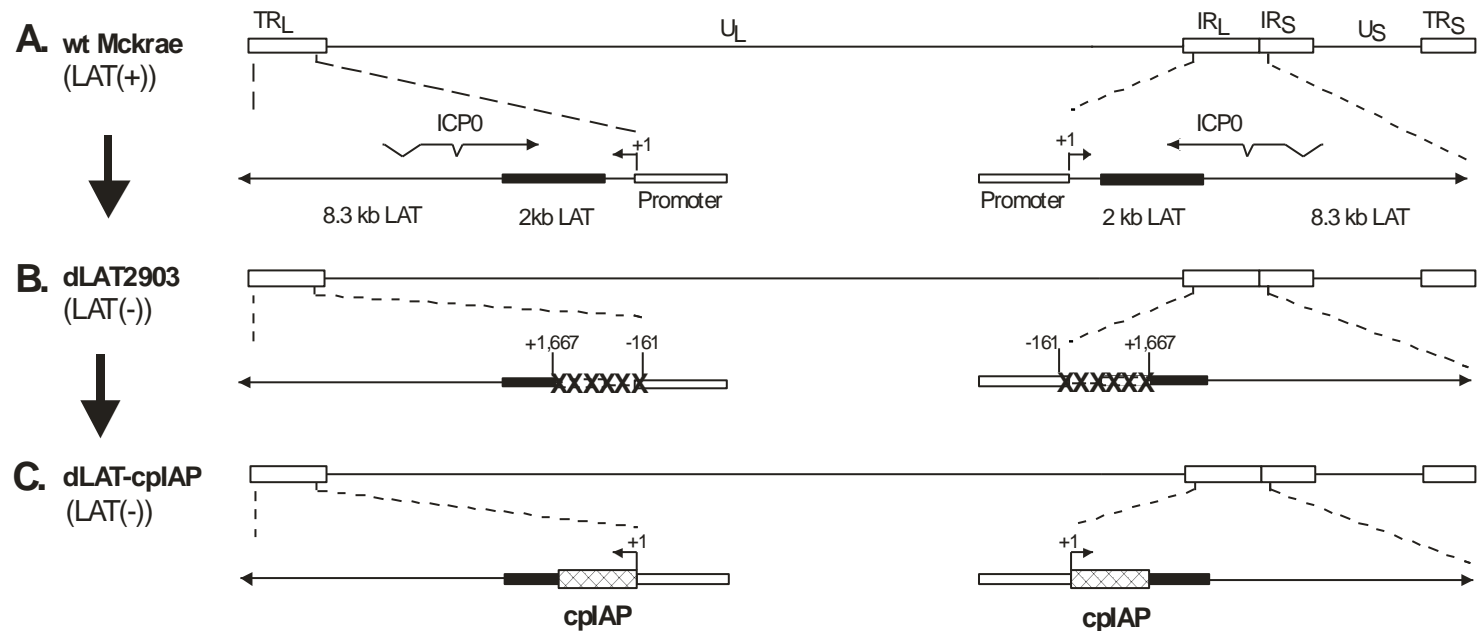

**Supp Fig. 1. Structure of the dLAT2903 and dLAT-cplAP mutant viruses.** (A) The top schematic diagram shows the HSV-1 McKrae genome in the prototypic orientation.  $TR_L$  and  $IR_L$  represent the terminal and internal (or inverted) long repeats, respectively, and  $TR_S$  and  $IR_S$  represent the terminal and internal (or inverted) short repeats, respectively.  $U_L$  and  $U_S$  represent the long and short unique regions, respectively. The solid rectangle represents the very stable 2 kb LAT. The start site for LAT transcription is indicated by the arrow at +1. “TATA” designates the relative location of the LAT promoter TATA box 28 nt upstream of the start of transcription. (B) dLAT2903 has a deletion from LAT nucleotides -161 to +1667 in both copies of LAT and makes no LAT RNA. (C) dLAT-cplAP was constructed from dLAT2903 by homologous recombination between dLAT2903 DNA and a plasmid containing the complete LAT promoter and the entire structural cplAP gene (including its 3' poly(A) signal) as described previously (11, 50).
